# Supplementary material
Source: PubMed Central journal article supplement (PMC4987850)
Supplement: npp201654x4.pdf [file npp201654x4.pdf]

Figure S3

Prefrontal Cortex

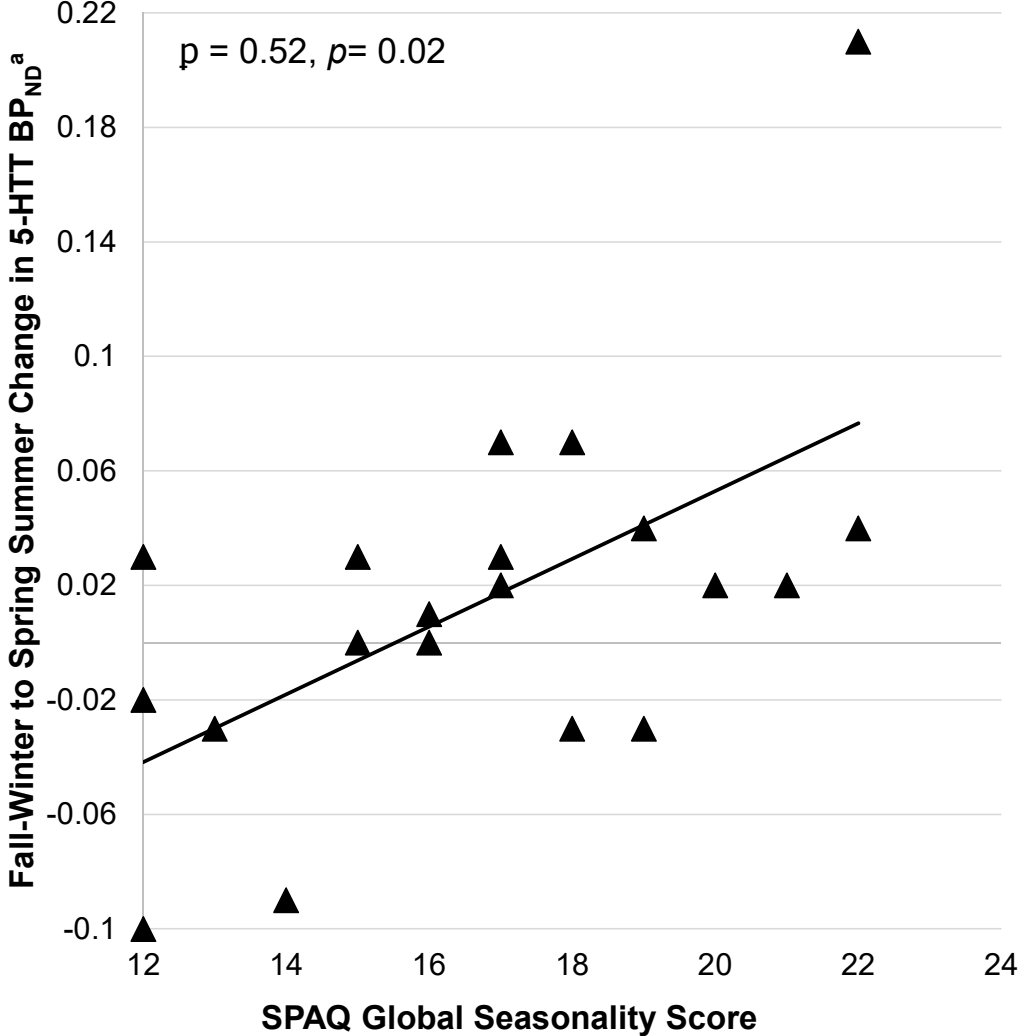

Anterior Cingulate Cortex

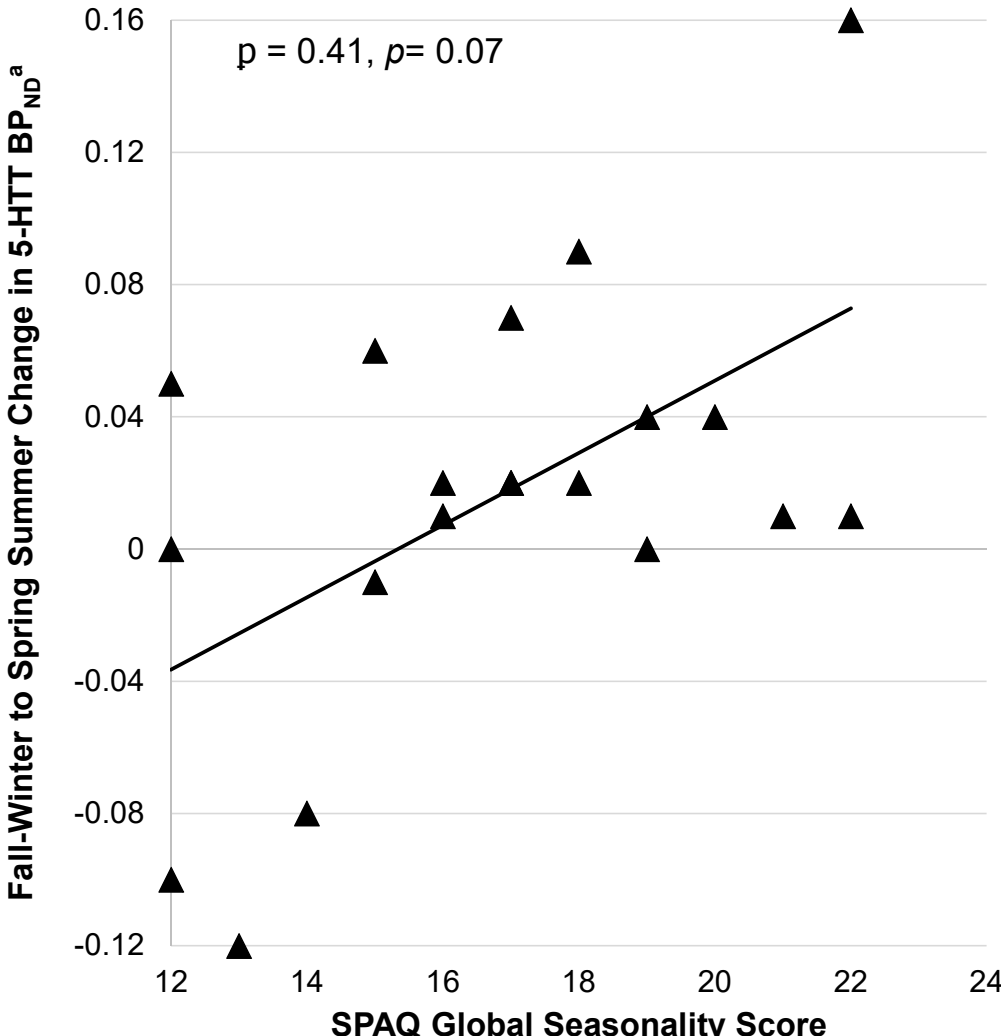

<sup>a</sup> $\Delta$  5-HTT BP<sub>ND</sub> calculated as follows:  $([5\text{-HTT BP}_{ND(\text{Winter})} - 5\text{-HTT BP}_{ND(\text{Summer})})$
